# Supplementary material
Source: Springer Nature journal article supplement (https://www.springermedizin.de/resource/supplementary/12889_2010_2047_MOESM1_ESM.pdf/9484424)
Supplement: MOESM1 [file 9484424]

# POPULATION FLOW-CHART

Driving Population:  
Province of Barcelona

Stratified (age and gender)  
sample size needed: N=1,540

Invited to participate

Informed Consent

Don't accept

Inclusion Visit  
Survey (health  
professional)

Cohort Follow-up  
Phone Questionnaire
